# Supplementary material
Source: HighWire-hosted journal article supplement (https://bmjopen.bmj.com/content/7/3/e013817)
Supplement: inline-supplementary-material-1 [file inline-supplementary-material-1.pdf]

## Appendix

**eFigure 1 Social acceptability – intolerance of smoking in public and indoor places: Urban-rural differences**

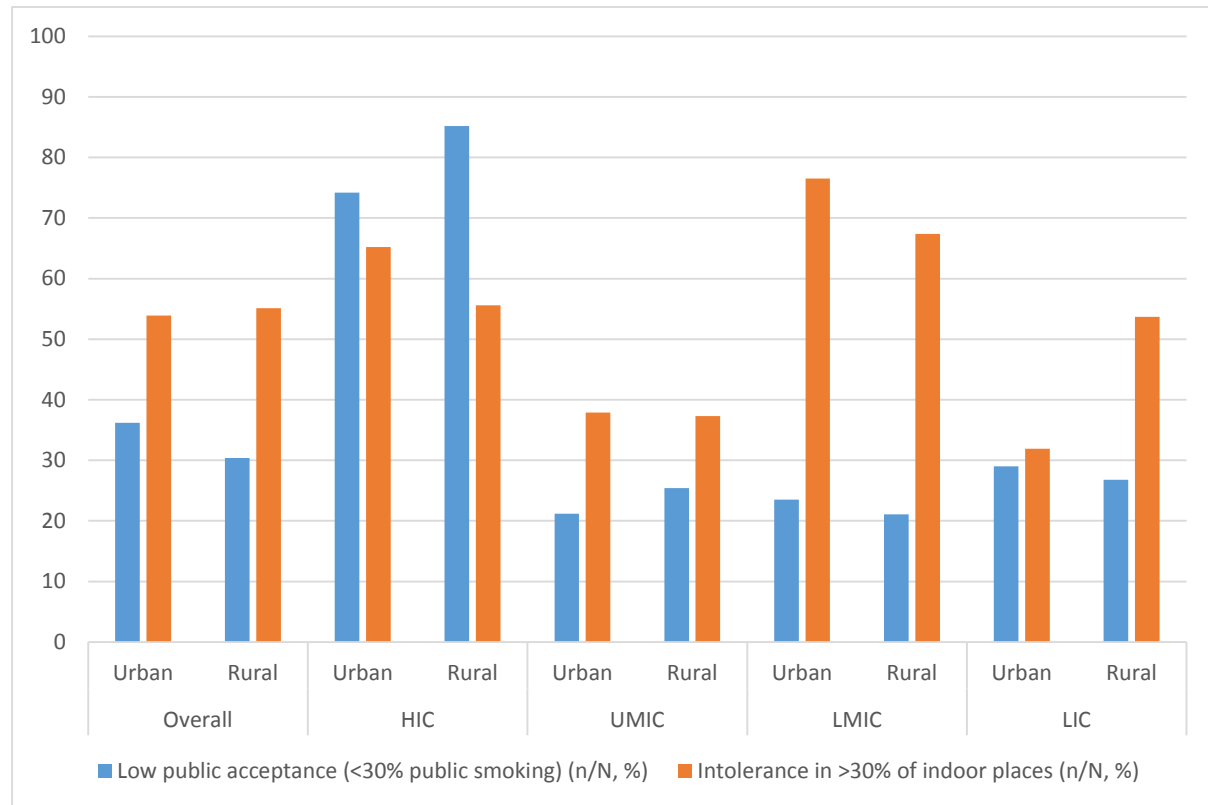

**eFigure 2 Social acceptability – disapproval of youth and adult smoking:  
Urban-rural differences**

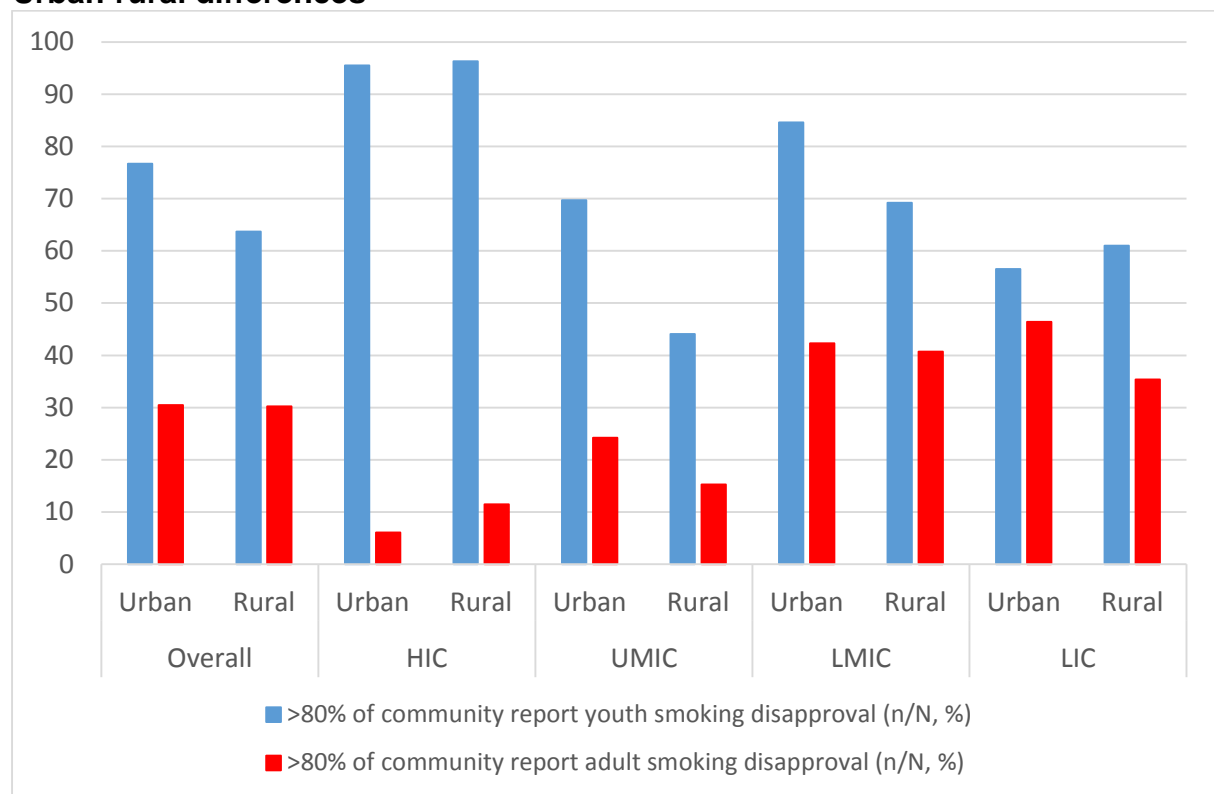

**eFigure 3 – Communities with average knowledge score 80% or more**

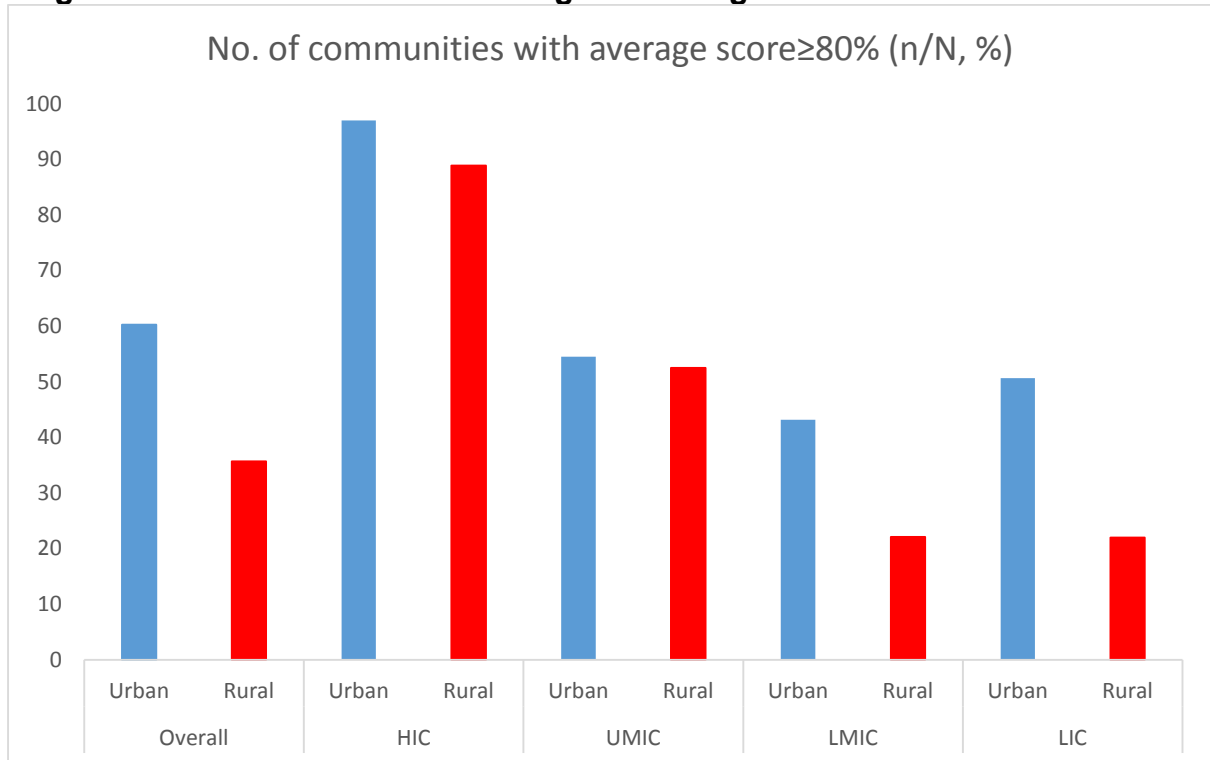

**eFigure 4 The odds of quitting for quintiles of tobacco environment scores from multilevel logistic regression models adjusted by age (M = men and W = women)**

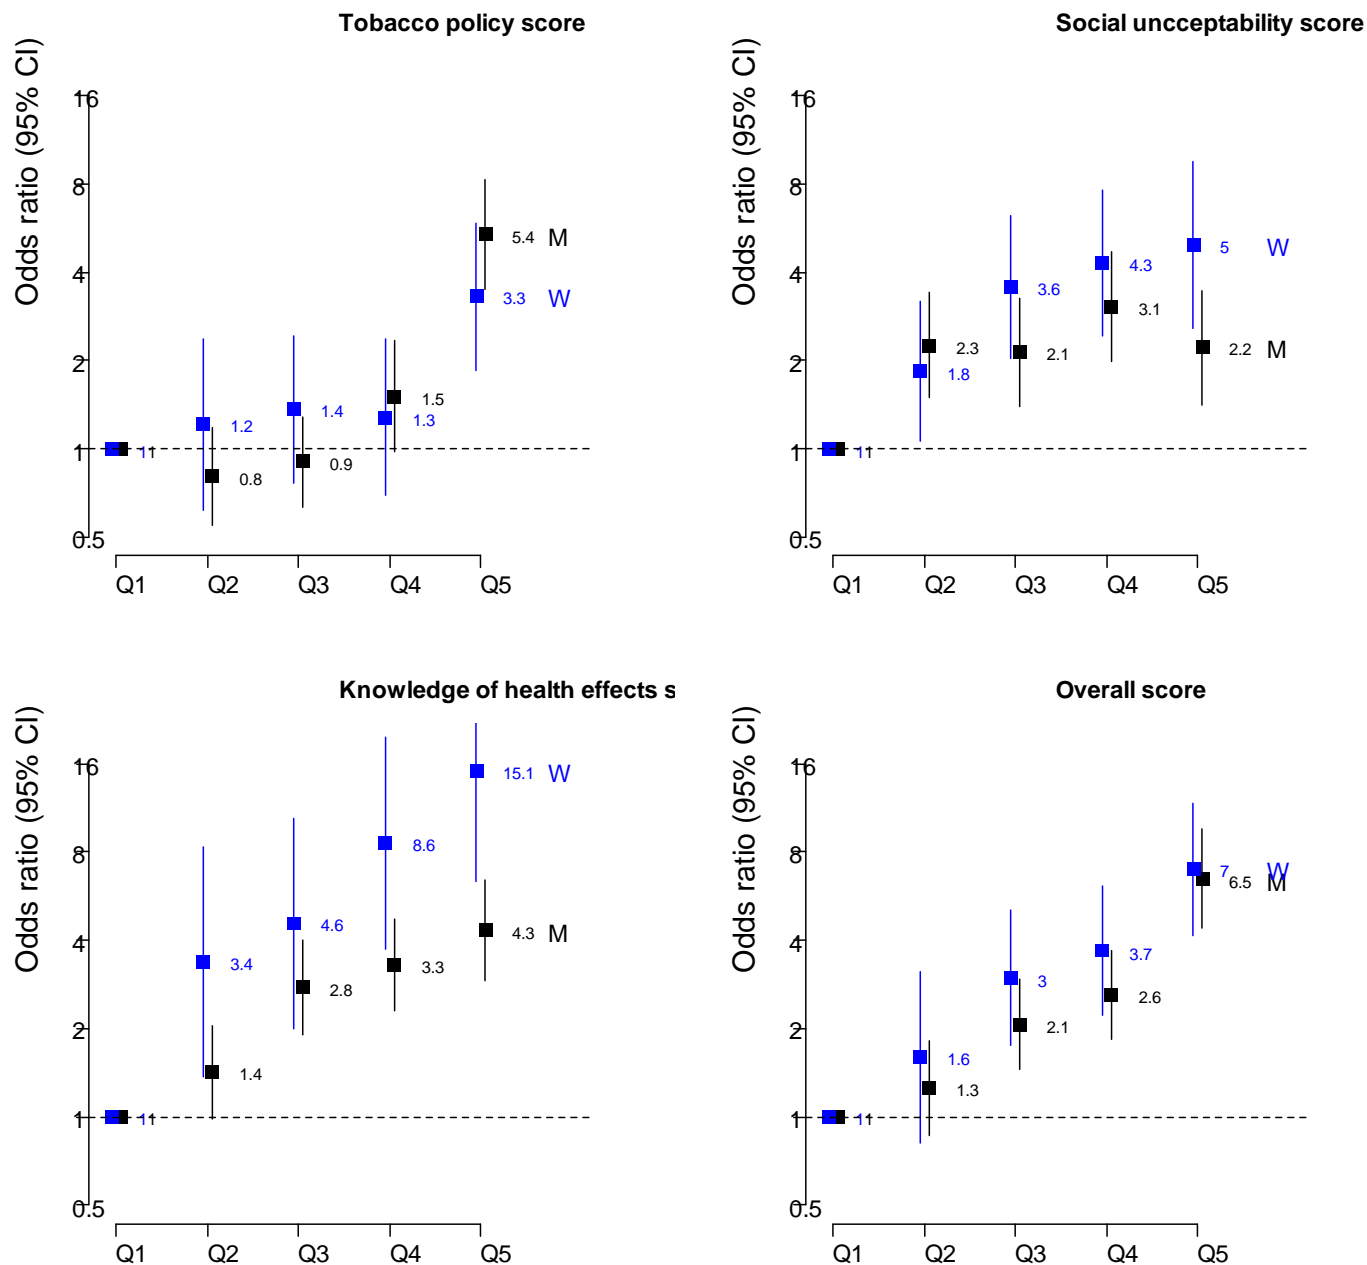

Notes for eFigure 1: Odds ratios from multilevel logistic regression models of quitting with random effects specified for communities. Models are age-adjusted and stratified by sex with separate models fitted for each score. Sex interactions for the effect of summary scores on quitting were statistically significant ( $P < 0.001$ ) in all models.
